# Supplementary material
Source: publisher figshare collection journal article supplement (https://karger.figshare.com/articles/dataset/_/5123986)
Supplement: Supplementary file 1 [file 1]

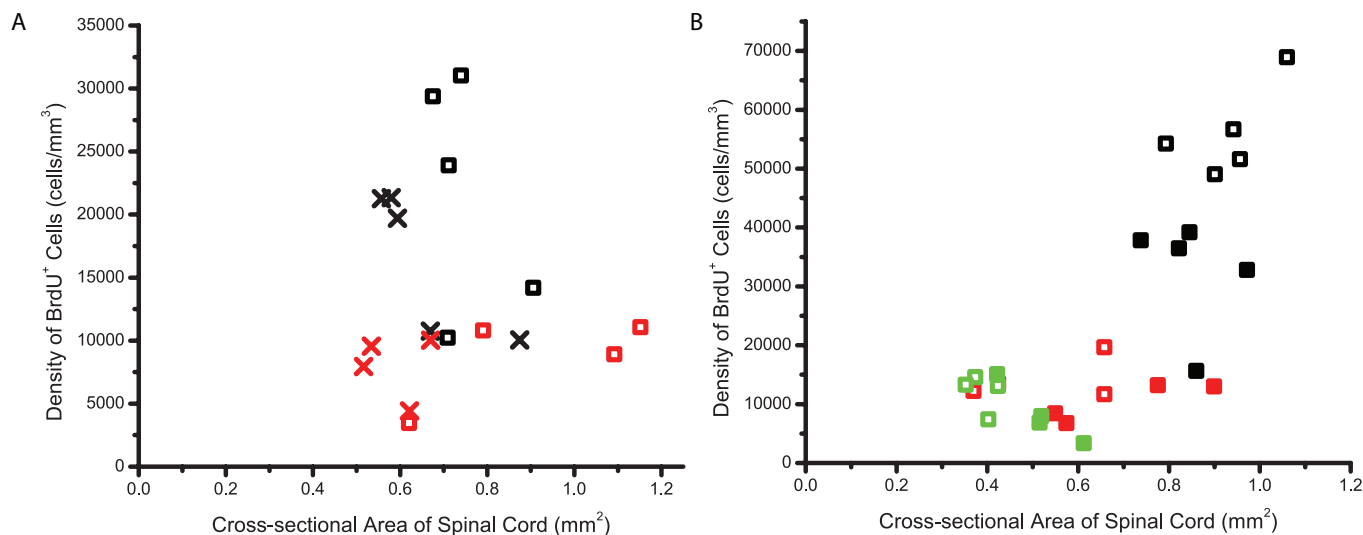

Supplemental Figure 1. Relationship between total cross-sectional area of the spinal cord and BrdU<sup>+</sup> cell density in Experiment 1 (A, single BrdU injection) and Experiment 2 (B, Five BrdU injections). Treatment groups indicated by symbol color (Black = Transected; Red = Sham; Green = Unoperated). Survival Time indicated by symbol shape (Crosses = 1-day; Open squares = 14-day; Filled squares = 30-day). Treatment significantly affected BrdU<sup>+</sup> cell density in both experiments (GLM, Experiment 1,  $F_{(1,15)} = 13.0$ ,  $p < 0.01$ ; Experiment 2,  $F_{(2,22)} = 9.05$ ,  $p < 0.01$ ), but cross sectional area of the spinal cord was not significantly related to BrdU<sup>+</sup> cell density (GLM, Experiment 1,  $F_{(1,15)} = 0.01$ ,  $p > 0.9$ ; Experiment 2,  $F_{(1,22)} = 0.65$ ,  $p = 0.43$ ).
